# Supplementary material for: Between light and dark, source and sink: N₂O dynamics in a subarctic, nutrient-poor permafrost peatland
Source: Research Square preprint supplement (doi:10.21203/rs.3.rs-8204920/v1), 2025-12-15
Supplement: Supplementary file 1 [file 19b0aa05213ef4589503f209.pdf]

## Supplementary Information

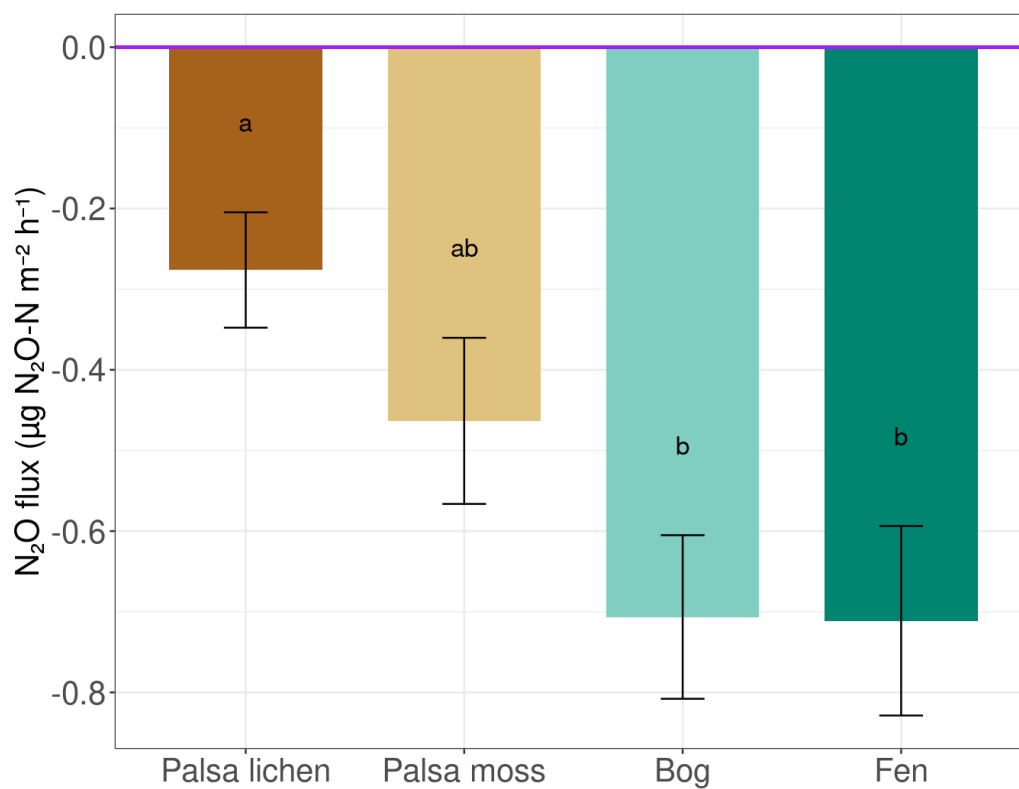

Figure S1: N<sub>2</sub>O flux over all measurement campaigns and micro habitats, excluding one hot spot (n=?). Letters indicate significance according to ANOVA and Tukey HSD post-hoc tests, with differing letters between micro habitats indicating significant differences. The purple horizontal line indicates the border between a source (positive values) and sink (negative values).

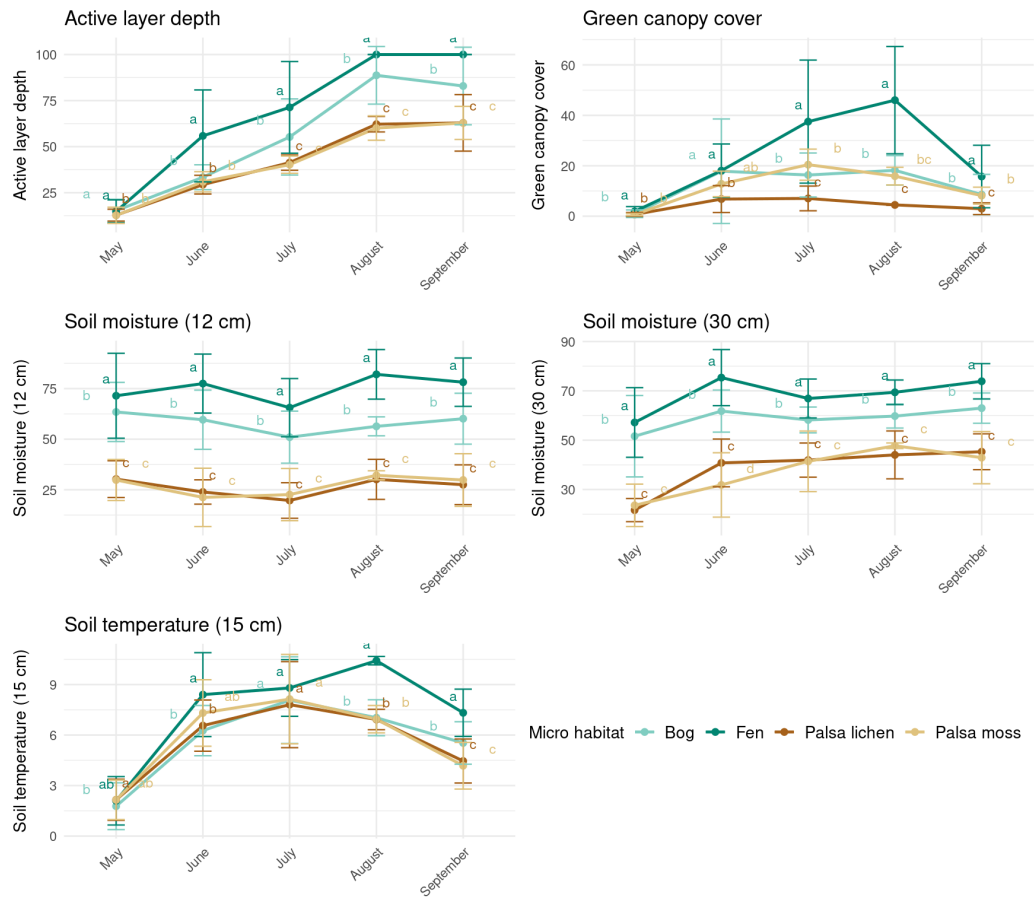

Group letters (a, b, c,...) indicate statistically significant differences (Tukey HSD,  $p < 0.05$ ).

Figure S2: Monthly means (error bars indicating  $\pm$  standard deviation) of active layer depth, green canopy cover, soil moisture at 12 cm and 30 cm, and soil temperature at 15 cm between May and September, divided into palsa lichen, palsa moss, bog, and fen habitats. Group letters (a,b,c,...) indicate statistically significant differences to other micro habitats (ANOVA and Tukey HSD post-hoc test,  $p < 0.05$ ).

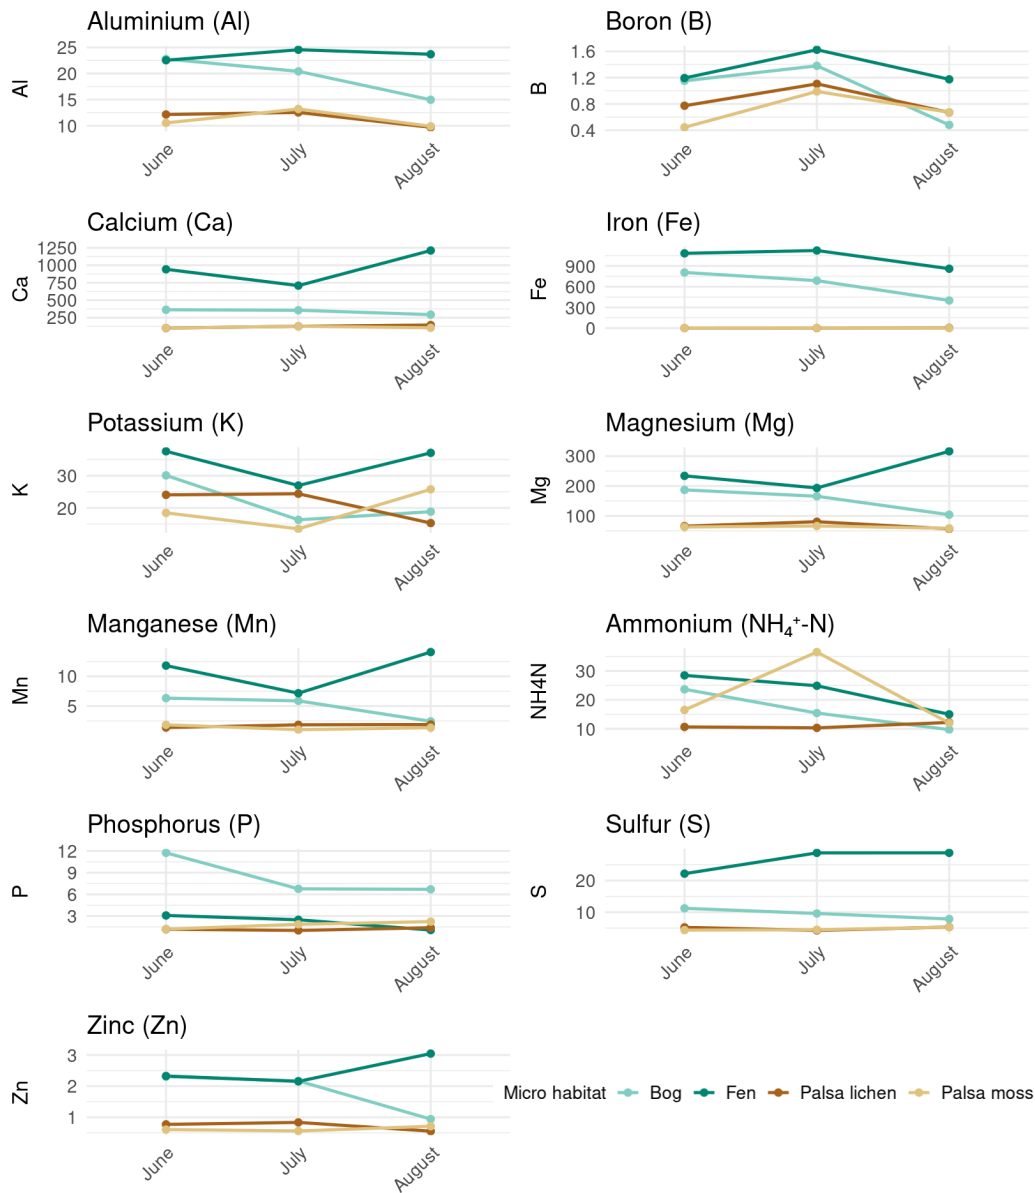

Figure S3: Nutrient values of aluminium (Al), boron (B), calcium (Ca), iron (Fe), potassium (K), magnesium (Mg), Manganese (Mn), Ammonium (NH<sub>4</sub><sup>+</sup>), phosphorus (P), sulfur (S) and zinc (Zn) per micro habitat in µg nutrient / 10 cm<sup>3</sup> / burial time (3 weeks).

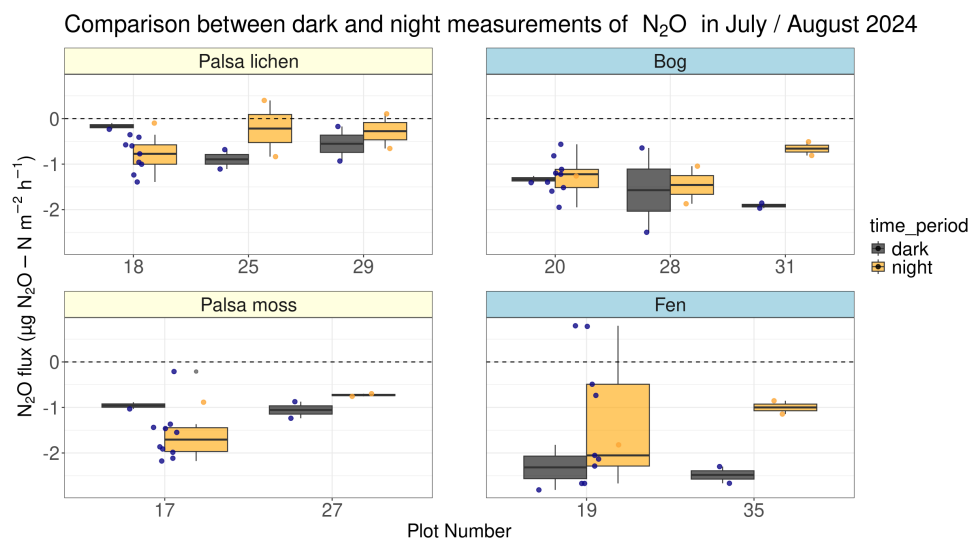

Figure S4: Comparison between night and dark measurements per micro-habitat. Box plots show dark measurements (during day time with a non-transparent tarpaulin cover) in grey and night time measurements in orange (without a non-transparent tarpaulin cover). Individual data is shown in coloured points around the boxplots (jitter).

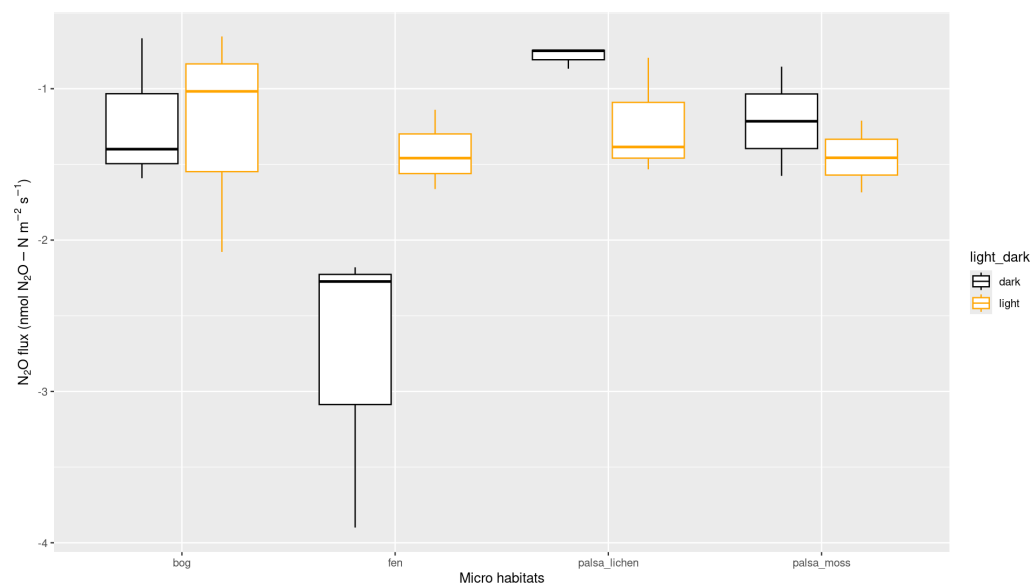

Figure S5: Storflakket may currently be wrong

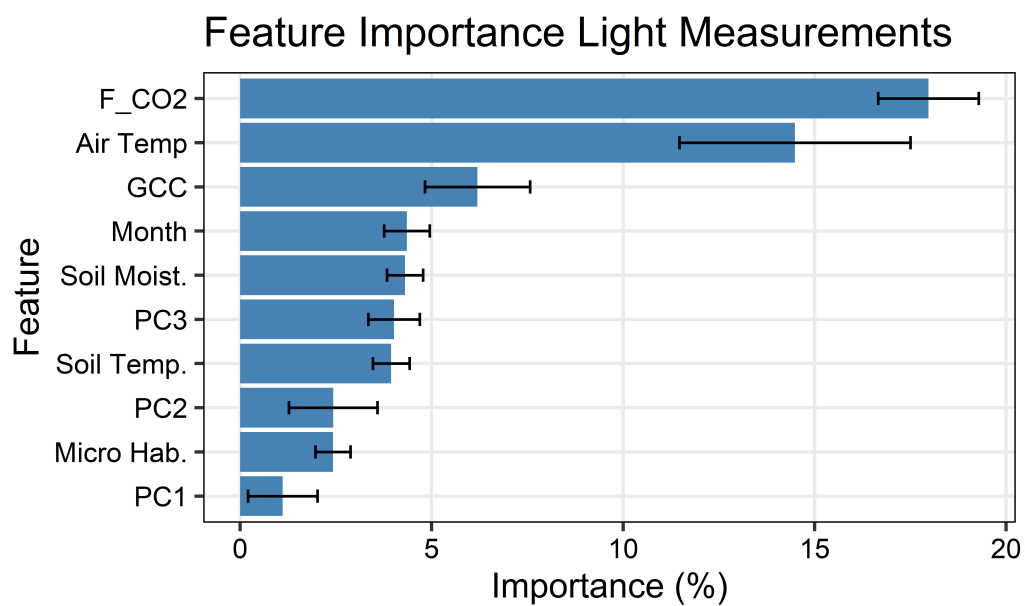

Figure S6: Importance of environmental variables ("features") **and nutrients during light measurements**, with F\_CO2 = NEE, Air Temp. = air temperature, Month = measurement campaign month, Soil Moist. = soil moisture, PAR = photosynthetically active radiation, GCC = green canopy cover, Micro Hab. = micro habitat, and Soil Temp. = soil temperature

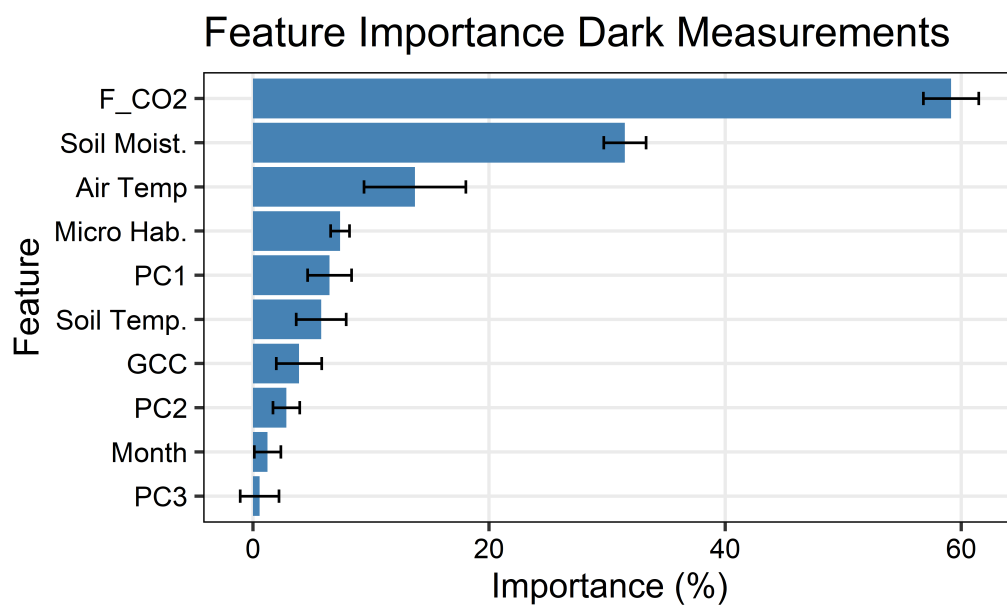

Figure S7: Importance of environmental variables ("features") **and nutrients during dark measurements**, with F\_CO2 = NEE, Air Temp. = air temperature, Month = measurement campaign month, Soil Moist. = soil moisture, PAR = photosynthetically active radiation, GCC = green canopy cover, Micro Hab. = micro habitat, and Soil Temp. = soil temperature

Table S1: Number of replicates per plot\_no, micro habitat, and exact coordinates of the final 24 chamber base position

| Transect | Plot | Micro habitat | n replicates | Y coordinate | X coordinate |
|----------|------|---------------|--------------|--------------|--------------|
| 1        | 2    | Palsa lichen  | 58           | 68.35588     | 19.04357     |
| 1        | 7    | Bog           | 59           | 68.35595     | 19.04360     |
| 1        | 8    | Palsa moss    | 79           | 68.35601     | 19.04387     |
| 1        | 10   | Fen           | 62           | 68.35601     | 19.04411     |
| 1        | 11   | Palsa lichen  | 72           | 68.35604     | 19.04403     |
| 1        | 12   | Bog           | 72           | 68.35606     | 19.04402     |
| 2        | 15   | Palsa moss    | 58           | 68.35597     | 19.04599     |
| 2        | 17   | Palsa moss    | 62           | 68.35608     | 19.04625     |
| 2        | 18   | Palsa lichen  | 62           | 68.35610     | 19.04619     |
| 2        | 19   | Fen           | 76           | 68.35607     | 19.04681     |
| 2        | 20   | Bog           | 76           | 68.35612     | 19.04652     |
| 2        | 23   | Fen           | 57           | 68.35619     | 19.04701     |
| 3        | 25   | Palsa lichen  | 52           | 68.35770     | 19.05122     |
| 3        | 26   | Bog           | 48           | 68.35771     | 19.05117     |
| 3        | 27   | Palsa moss    | 48           | 68.35771     | 19.05109     |
| 3        | 28   | Bog           | 56           | 68.35760     | 19.05101     |
| 3        | 29   | Palsa lichen  | 48           | 68.35763     | 19.05102     |
| 3        | 30   | Palsa moss    | 41           | 68.35761     | 19.05116     |
| 3        | 31   | Bog           | 55           | 68.35763     | 19.05152     |
| 3        | 32   | Palsa moss    | 46           | 68.35766     | 19.05167     |
| 3        | 33   | Palsa lichen  | 46           | 68.35767     | 19.05174     |
| 3        | 34   | Fen           | 49           | 68.35793     | 19.05116     |
| 3        | 35   | Fen           | 38           | 68.35801     | 19.05128     |
| 3        | 36   | Fen           | 34           | 68.35806     | 19.05139     |
